# Supplementary material
Source: HighWire-hosted journal article supplement (https://gut.bmj.com/content/70/3/485)
Supplement: inline-supplementary-material-11 [file inline-supplementary-material-11.xlsx]

## Sheet: FIN
Suppl Table 4_FIN cohort
exac_ENSG00000143379_2020_04_02_10_50_04_FIN
Variant	Enrichment	Position	RSID	Reference	Alternate	Consequence	Protein Consequence	Transcript Consequence	Filter	Annotation	ExAC NFE AF	IBD AF	non-IBD AF	Odds Ratio	P-value	Allele Count African	Allele Number African	Homozygote Count African	Allele Count East Asian	Allele Number East Asian	Homozygote Count East Asian	Allele Count European (Non-Finnish)	Allele Number European (Non-Finnish)	Homozygote Count European (Non-Finnish)	Allele Count Finnish	Allele Number Finnish	Homozygote Count Finnish	Allele Count Latino	Allele Number Latino	Homozygote Count Latino	Allele Count Other	Allele Number Other	Homozygote Count Other	Allele Count South Asian	Allele Number South Asian	Homozygote Count South Asian
1:150935127 C / T (rs145309946)	0.989	150935127	rs145309946	C	T	p.Arg1075Cys	p.Arg1075Cys	c.3223C>T	PASS	missense	0.000408	0.00216	0.000403	3.05	0.0127										0.0021552	0.0004029	2.58664
1:150933591 G / T (rs149404089)	0.532	150933591	rs149404089	G	T	p.Arg1018Leu	p.Arg1018Leu	c.3053G>T	PASS	missense	0.000379	0.000718	0.000201	2.39	0.0633										0.00071839	0.00020149	5.96793
1:150900342 T / C (rs201917860)	13.2	150900342	rs201917860	T	C	p.Met51Thr	p.Met51Thr	c.152T>C	PASS	missense	0.000408	0.00718	0.00534	1.72	0.0897										0.0071839	0.0053374	1.30715
1:150899275 T / C (rs374583229)		150899275	rs374583229	T	C	p.Trp8Arg†	p.Trp8Arg	c.22T>C	PASS	missense	0.000267			1.66	0.0969										-9	-9	-9
1:150923841 G / T		150923841	.	G	T	p.Lys738Asn	p.Lys738Asn	c.2214G>T	PASS	missense		0	0.000101	1.92	0.109										0	0.00010072	5.66326
1:150933386 C / G		150933386	.	C	G	p.Pro950Ala	p.Pro950Ala	c.2848C>G	PASS	missense		0.000719	5.05e-05	2.11	0.112										0.00071942	5.0474e-05	5.38329
1:150933377 T / C	11.8	150933377	.	T	C	p.Ser947Pro	p.Ser947Pro	c.2839T>C	PASS	missense	0.000236	0.00216	0.00278	1.95	0.113										0.0021583	0.0027786	1.38867
1:150900260 G / C (rs200954915)	8.57	150900260	rs200954915	G	C	p.Glu24Gln	p.Glu24Gln	c.70G>C	PASS	missense	4.7e-05	0.000718	0.000403	1.97	0.175										0.00071839	0.00040282	2.13196
1:150933600 C / T (rs150892641)		150933600	rs150892641	C	T	p.Ala1021Val	p.Ala1021Val	c.3062C>T	PASS	missense	0.000617			0.709	0.238										-9	-9	-9
1:150934618 C / G		150934618	.	C	G	p.Arg1048Gly	p.Arg1048Gly	c.3142C>G	PASS	missense				0.63	0.326										-9	-9	-9
1:150933468 C / T (rs113110991)	0.697	150933468	rs113110991	C	T	p.Pro977Leu	p.Pro977Leu	c.2930C>T	PASS	missense	0.00274	0	0.00191	1.27	0.359										0	0.0019134	0.184686
1:150921941 C / T		150921941	.	C	T	p.Thr507Ile	p.Thr507Ile	c.1520C>T	PASS	missense				0.647	0.375										-9	-9	-9
1:150933620 G / A		150933620	.	G	A	p.Gly1028Arg	p.Gly1028Arg	c.3082G>A	PASS	missense	1.59e-05			0.701	0.382										-9	-9	-9
1:150935124 C / T (rs147846533)	0.582	150935124	rs147846533	C	T	p.Arg1074Cys	p.Arg1074Cys	c.3220C>T	PASS	missense	0.000235	0	0.000151	1.5	0.417										0	0.00015107	1.50265
1:150916432 T / C (rs140937930)		150916432	rs140937930	T	C	p.Met237Thr†	p.Met237Thr	c.710T>C	PASS	missense	6.27e-05			1.49	0.418										-9	-9	-9
1:150935609 A / G (rs143031515)	0.252	150935609	rs143031515	A	G	p.Met1151Val	p.Met1151Val	c.3451A>G	PASS	missense	0.000802	0	0.000202	0.682	0.431										0	0.00020184	1.54465
1:150933501 A / G		150933501	.	A	G	p.Asn988Ser	p.Asn988Ser	c.2963A>G	PASS	missense	0.000157			0.705	0.475										-9	-9	-9
1:150933514 A / T (rs138864506)		150933514	rs138864506	A	T	p.Glu992Asp	p.Glu992Asp	c.2976A>T	PASS	missense	0.000674	0.000718	0	1.4	0.484										0.00071839	0	60.4671
1:150936815 T / C (rs147607619)	0.512	150936815	rs147607619	T	C	p.Ile1284Thr	p.Ile1284Thr	c.3851T>C	PASS	missense	3.18e-05	0	5.04e-05	1.31	0.537										0	5.0352e-05	5.06574
1:150933564 G / C (rs372956009)		150933564	rs372956009	G	C	p.Gly1009Ala	p.Gly1009Ala	c.3026G>C	PASS	missense	1.57e-05			1.21	0.678										-9	-9	-9
1:150936011 A / G (rs371841791)		150936011	rs371841791	A	G	p.Met1155Val	p.Met1155Val	c.3463A>G	PASS	missense	0.000142			0.826	0.685										-9	-9	-9
1:150916444 G / A (rs138641374)	4.38	150916444	rs138641374	G	A	p.Arg241Gln†	p.Arg241Gln	c.722G>A	PASS	missense	0.000564	0.00216	0.00247	0.911	0.812										0.0021552	0.0024673	1.03272
1:150899276 G / T		150899276	.	G	T	p.Trp8Leu†	p.Trp8Leu	c.23G>T	PASS	missense				1.12	1										-9	-9	-9
1:150900201 T / C		150900201	.	T	C	p.Leu4Pro	p.Leu4Pro	c.11T>C	PASS	missense				1.1	1										-9	-9	-9
1:150900387 C / T		150900387	.	C	T	p.Thr66Ile	p.Thr66Ile	c.197C>T	PASS	missense	1.57e-05			1.08	1										-9	-9	-9
1:150900417 C / T (rs144623268)		150900417	rs144623268	C	T	p.Ala76Val	p.Ala76Val	c.227C>T	PASS	missense				0.764	1										-9	-9	-9
1:150900430 A / T (rs141840418)		150900430	rs141840418	A	T	p.Gln80His	p.Gln80His	c.240A>T	PASS	missense				0.767	1										-9	-9	-9
1:150902487 A / G		150902487	.	A	G	p.Lys102Arg	p.Lys102Arg	c.305A>G	PASS	missense	0			1.08	1										-9	-9	-9
1:150902504 C / T	3.21	150902504	.	C	T	p.Arg108Trp	p.Arg108Trp	c.322C>T	PASS	missense	1.57e-05	0	5.04e-05	1.14	1										0	5.0363e-05	2.3444
1:150902535 G / A		150902535	.	G	A	p.Arg118Gln	p.Arg118Gln	c.353G>A	PASS	missense	4.7e-05			1.09	1										-9	-9	-9
1:150913872 A / G (rs374865519)		150913872	rs374865519	A	G	p.Asn172Ser	p.Asn172Ser	c.515A>G	PASS	missense	4.76e-05			0.763	1										-9	-9	-9
1:150915400 A / G		150915400	.	A	G	p.Tyr249Cys	p.Tyr249Cys	c.746A>G	PASS	missense				0.906	1										-9	-9	-9
1:150915469 A / G		150915469	.	A	G	p.Asn272Ser	p.Asn272Ser	c.815A>G	PASS	missense				1.08	1										-9	-9	-9
1:150916454 C / T		150916454	.	C	T	p.Pro312Ser	p.Pro312Ser	c.934C>T	PASS	missense				0.762	1										-9	-9	-9
1:150917416 A / G		150917416	.	A	G	p.Ile324Met	p.Ile324Met	c.972A>G	PASS	missense				1.08	1										-9	-9	-9
1:150917433 G / A (rs200241875)		150917433	rs200241875	G	A	p.Arg330His	p.Arg330His	c.989G>A	PASS	missense	0			1.09	1										-9	-9	-9
1:150917561 A / G		150917561	.	A	G	p.Ser373Gly	p.Ser373Gly	c.1117A>G	PASS	missense				0.894	1										-9	-9	-9
1:150917582 C / A		150917582	.	C	A	p.Leu380Met	p.Leu380Met	c.1138C>A	PASS	missense	1.58e-05			1.09	1										-9	-9	-9
1:150919368 A / G		150919368	.	A	G	p.Lys383Glu	p.Lys383Glu	c.1147A>G	PASS	missense				0.9	1										-9	-9	-9
1:150919407 G / A		150919407	.	G	A	p.Glu396Lys	p.Glu396Lys	c.1186G>A	PASS	missense				1.08	1										-9	-9	-9
1:150919413 A / C		150919413	.	A	C	p.Met398Leu	p.Met398Leu	c.1192A>C	PASS	missense				0.718	1										-9	-9	-9
1:150919431 T / G		150919431	.	T	G	p.Ser404Ala	p.Ser404Ala	c.1210T>G	PASS	missense				1.08	1										-9	-9	-9
1:150919485 A / G		150919485	.	A	G	p.Met422Val	p.Met422Val	c.1264A>G	PASS	missense	1.57e-05			0.944	1										-9	-9	-9
1:150921610 G / C		150921610	.	G	C	p.Ser427Thr	p.Ser427Thr	c.1280G>C	PASS	missense				1.09	1										-9	-9	-9
1:150921639 G / T		150921639	.	G	T	p.Asp437Tyr	p.Asp437Tyr	c.1309G>T	PASS	missense				1.09	1										-9	-9	-9
1:150921690 A / G (rs373481235)		150921690	rs373481235	A	G	p.Thr454Ala	p.Thr454Ala	c.1360A>G	PASS	missense	4.7e-05			0.767	1										-9	-9	-9
1:150921709 C / T		150921709	.	C	T	p.Pro460Leu	p.Pro460Leu	c.1379C>T	PASS	missense				0.91	1										-9	-9	-9
1:150921863 C / G		150921863	.	C	G	p.Ala481Gly	p.Ala481Gly	c.1442C>G	PASS	missense				1.08	1										-9	-9	-9
1:150921940 A / C (rs140025790)		150921940	rs140025790	A	C	p.Thr507Pro	p.Thr507Pro	c.1519A>C	PASS	missense				0.771	1										-9	-9	-9
1:150921964 G / A (rs185244961)		150921964	rs185244961	G	A	p.Val515Ile	p.Val515Ile	c.1543G>A	PASS	missense				0.765	1										-9	-9	-9
1:150921973 G / C (rs368655601)		150921973	rs368655601	G	C	p.Gly518Arg	p.Gly518Arg	c.1552G>C	PASS	missense	3.14e-05			0.765	1										-9	-9	-9
1:150922981 C / T		150922981	.	C	T	p.Pro543Leu	p.Pro543Leu	c.1628C>T	PASS	missense				1.26	1										-9	-9	-9
1:150923022 C / T		150923022	.	C	T	p.Arg557Trp	p.Arg557Trp	c.1669C>T	PASS	missense				1.08	1										-9	-9	-9
1:150923137 G / A		150923137	.	G	A	p.Arg595Gln	p.Arg595Gln	c.1784G>A	PASS	missense				1.08	1										-9	-9	-9
1:150923217 G / A		150923217	.	G	A	p.Gly622Ser	p.Gly622Ser	c.1864G>A	PASS	missense				1.08	1										-9	-9	-9
1:150923262 A / T		150923262	.	A	T	p.Thr637Ser	p.Thr637Ser	c.1909A>T	PASS	missense				1.09	1										-9	-9	-9
1:150933242 AATG / A		150933242	.	AATG	A	p.Asp904del	p.Asp904del	c.2710_2712delGAT	PASS	inframe deletion				1.08	1										-9	-9	-9
1:150933387 C / A (rs368895041)		150933387	rs368895041	C	A	p.Pro950Gln	p.Pro950Gln	c.2849C>A	PASS	missense	4.71e-05			0.766	1										-9	-9	-9
1:150933582 G / A		150933582	.	G	A	p.Gly1015Glu	p.Gly1015Glu	c.3044G>A	PASS	missense	1.58e-05			1.08	1										-9	-9	-9
1:150933612 C / T		150933612	.	C	T	p.Ser1025Phe	p.Ser1025Phe	c.3074C>T	PASS	missense		0	5.04e-05	1.29	1										0	5.0352e-05	5.00631
1:150934619 G / A (rs148408413)		150934619	rs148408413	G	A	p.Arg1048Gln	p.Arg1048Gln	c.3143G>A	PASS	missense				0.767	1										-9	-9	-9
1:150935098 C / T		150935098	.	C	T	p.Pro1065Leu	p.Pro1065Leu	c.3194C>T	PASS	missense				0.912	1										-9	-9	-9
1:150935160 C / T		150935160	.	C	T	p.Arg1086Ter	p.Arg1086Ter	c.3256C>T	PASS	stop gained	3.14e-05			0.766	1										-9	-9	-9
1:150935161 G / A		150935161	.	G	A	p.Arg1086Gln	p.Arg1086Gln	c.3257G>A	PASS	missense	1.57e-05			1.21	1										-9	-9	-9
1:150935489 G / A		150935489	.	G	A	p.Glu1111Lys	p.Glu1111Lys	c.3331G>A	PASS	missense				1.3	1										-9	-9	-9
1:150935529 C / T		150935529	.	C	T	p.Ser1124Leu	p.Ser1124Leu	c.3371C>T	PASS	missense	1.57e-05			1.08	1										-9	-9	-9
1:150936039 C / T		150936039	.	C	T	p.Thr1164Ile	p.Thr1164Ile	c.3491C>T	PASS	missense				1.08	1										-9	-9	-9
1:150936122 C / T		150936122	.	C	T	p.Pro1192Ser	p.Pro1192Ser	c.3574C>T	PASS	missense				0.766	1										-9	-9	-9
1:150936129 G / A		150936129	.	G	A	p.Arg1194His	p.Arg1194His	c.3581G>A	PASS	missense	0			1.08	1										-9	-9	-9
1:150936251 T / G (rs115690224)		150936251	rs115690224	T	G	p.Leu1235Val†	p.Leu1235Val	c.3703T>G	PASS	missense	3.26e-05			1.09	1										-9	-9	-9
1:150936499 A / G		150936499	.	A	G	p.Gln1233Arg	p.Gln1233Arg	c.3698A>G	PASS	missense				1.08	1										-9	-9	-9

## Sheet: NFE
Suppl Table 4_NFE cohort
exac_ENSG00000143379_2020_04_02_10_50_19_NFE
Variant	Enrichment	Position	RSID	Reference	Alternate	Consequence	Protein Consequence	Transcript Consequence	Filter	Annotation	ExAC NFE AF	IBD AF	non-IBD AF	Odds Ratio	P-value	Allele Count African	Allele Number African	Homozygote Count African	Allele Count East Asian	Allele Number East Asian	Homozygote Count East Asian	Allele Count European (Non-Finnish)	Allele Number European (Non-Finnish)	Homozygote Count European (Non-Finnish)	Allele Count Finnish	Allele Number Finnish	Homozygote Count Finnish	Allele Count Latino	Allele Number Latino	Homozygote Count Latino	Allele Count Other	Allele Number Other	Homozygote Count Other	Allele Count South Asian	Allele Number South Asian	Homozygote Count South Asian
1:150935127 C / T (rs145309946)		150935127	rs145309946	C	T	p.Arg1075Cys	p.Arg1075Cys	c.3223C>T	PASS	missense	0.000408	0.000604	0.000181	3.05	0.0127										0.0021552	0.0004029	2.58664
1:150933591 G / T (rs149404089)		150933591	rs149404089	G	T	p.Arg1018Leu	p.Arg1018Leu	c.3053G>T	PASS	missense	0.000379	0.000403	0.000542	2.39	0.0633										0.00071839	0.00020149	5.96793
1:150900342 T / C (rs201917860)		150900342	rs201917860	T	C	p.Met51Thr	p.Met51Thr	c.152T>C	PASS	missense	0.000408	0.000101	0	1.72	0.0897										0.0071839	0.0053374	1.30715
1:150899275 T / C (rs374583229)		150899275	rs374583229	T	C	p.Trp8Arg†	p.Trp8Arg	c.22T>C	PASS	missense	0.000267	0	0.000181	1.66	0.0969										-9	-9	-9
1:150923841 G / T		150923841	.	G	T	p.Lys738Asn	p.Lys738Asn	c.2214G>T	PASS	missense				1.92	0.109										0	0.00010072	5.66326
1:150933386 C / G		150933386	.	C	G	p.Pro950Ala	p.Pro950Ala	c.2848C>G	PASS	missense				2.11	0.112										0.00071942	5.0474e-05	5.38329
1:150933377 T / C		150933377	.	T	C	p.Ser947Pro	p.Ser947Pro	c.2839T>C	PASS	missense	0.000236	0.000203	0	1.95	0.113										0.0021583	0.0027786	1.38867
1:150900260 G / C (rs200954915)		150900260	rs200954915	G	C	p.Glu24Gln	p.Glu24Gln	c.70G>C	PASS	missense	4.7e-05			1.97	0.175										0.00071839	0.00040282	2.13196
1:150933600 C / T (rs150892641)		150933600	rs150892641	C	T	p.Ala1021Val	p.Ala1021Val	c.3062C>T	PASS	missense	0.000617	0.000704	0.000542	0.709	0.238										-9	-9	-9
1:150934618 C / G		150934618	.	C	G	p.Arg1048Gly	p.Arg1048Gly	c.3142C>G	PASS	missense				0.63	0.326										-9	-9	-9
1:150933468 C / T (rs113110991)		150933468	rs113110991	C	T	p.Pro977Leu	p.Pro977Leu	c.2930C>T	PASS	missense	0.00274	0.00403	0.00289	1.27	0.359										0	0.0019134	0.184686
1:150921941 C / T		150921941	.	C	T	p.Thr507Ile	p.Thr507Ile	c.1520C>T	PASS	missense				0.647	0.375										-9	-9	-9
1:150933620 G / A		150933620	.	G	A	p.Gly1028Arg	p.Gly1028Arg	c.3082G>A	PASS	missense	1.59e-05			0.701	0.382										-9	-9	-9
1:150935124 C / T (rs147846533)		150935124	rs147846533	C	T	p.Arg1074Cys	p.Arg1074Cys	c.3220C>T	PASS	missense	0.000235	0.000201	0.000181	1.5	0.417										0	0.00015107	1.50265
1:150916432 T / C (rs140937930)		150916432	rs140937930	T	C	p.Met237Thr†	p.Met237Thr	c.710T>C	PASS	missense	6.27e-05	0.000604	0.000361	1.49	0.418										-9	-9	-9
1:150935609 A / G (rs143031515)		150935609	rs143031515	A	G	p.Met1151Val	p.Met1151Val	c.3451A>G	PASS	missense	0.000802	0.000203	0.000544	0.682	0.431										0	0.00020184	1.54465
1:150933501 A / G		150933501	.	A	G	p.Asn988Ser	p.Asn988Ser	c.2963A>G	PASS	missense	0.000157	0.000302	0.000542	0.705	0.475										-9	-9	-9
1:150933514 A / T (rs138864506)		150933514	rs138864506	A	T	p.Glu992Asp	p.Glu992Asp	c.2976A>T	PASS	missense	0.000674	0.000503	0.000361	1.4	0.484										0.00071839	0	60.4671
1:150936815 T / C (rs147607619)		150936815	rs147607619	T	C	p.Ile1284Thr	p.Ile1284Thr	c.3851T>C	PASS	missense	3.18e-05	0.000101	0.000181	1.31	0.537										0	5.0352e-05	5.06574
1:150933564 G / C (rs372956009)		150933564	rs372956009	G	C	p.Gly1009Ala	p.Gly1009Ala	c.3026G>C	PASS	missense	1.57e-05	0.000101	0.000181	1.21	0.678										-9	-9	-9
1:150936011 A / G (rs371841791)		150936011	rs371841791	A	G	p.Met1155Val	p.Met1155Val	c.3463A>G	PASS	missense	0.000142	0.000101	0.000181	0.826	0.685										-9	-9	-9
1:150916444 G / A (rs138641374)		150916444	rs138641374	G	A	p.Arg241Gln†	p.Arg241Gln	c.722G>A	PASS	missense	0.000564	0.000201	0.000361	0.911	0.812										0.0021552	0.0024673	1.03272
1:150899276 G / T		150899276	.	G	T	p.Trp8Leu†	p.Trp8Leu	c.23G>T	PASS	missense		0.000101	0	1.12	1										-9	-9	-9
1:150900201 T / C		150900201	.	T	C	p.Leu4Pro	p.Leu4Pro	c.11T>C	PASS	missense		0.000101	0	1.1	1										-9	-9	-9
1:150900387 C / T		150900387	.	C	T	p.Thr66Ile	p.Thr66Ile	c.197C>T	PASS	missense	1.57e-05	0.000101	0	1.08	1										-9	-9	-9
1:150900417 C / T (rs144623268)		150900417	rs144623268	C	T	p.Ala76Val	p.Ala76Val	c.227C>T	PASS	missense		0	0.000181	0.764	1										-9	-9	-9
1:150900430 A / T (rs141840418)		150900430	rs141840418	A	T	p.Gln80His	p.Gln80His	c.240A>T	PASS	missense		0	0.000181	0.767	1										-9	-9	-9
1:150902487 A / G		150902487	.	A	G	p.Lys102Arg	p.Lys102Arg	c.305A>G	PASS	missense	0	0.000101	0	1.08	1										-9	-9	-9
1:150902504 C / T		150902504	.	C	T	p.Arg108Trp	p.Arg108Trp	c.322C>T	PASS	missense	1.57e-05			1.14	1										0	5.0363e-05	2.3444
1:150902535 G / A		150902535	.	G	A	p.Arg118Gln	p.Arg118Gln	c.353G>A	PASS	missense	4.7e-05	0.000101	0	1.09	1										-9	-9	-9
1:150913872 A / G (rs374865519)		150913872	rs374865519	A	G	p.Asn172Ser	p.Asn172Ser	c.515A>G	PASS	missense	4.76e-05	0	0.000181	0.763	1										-9	-9	-9
1:150915400 A / G		150915400	.	A	G	p.Tyr249Cys	p.Tyr249Cys	c.746A>G	PASS	missense				0.906	1										-9	-9	-9
1:150915469 A / G		150915469	.	A	G	p.Asn272Ser	p.Asn272Ser	c.815A>G	PASS	missense		0.000101	0	1.08	1										-9	-9	-9
1:150916454 C / T		150916454	.	C	T	p.Pro312Ser	p.Pro312Ser	c.934C>T	PASS	missense		0	0.000181	0.762	1										-9	-9	-9
1:150917416 A / G		150917416	.	A	G	p.Ile324Met	p.Ile324Met	c.972A>G	PASS	missense		0.000101	0	1.08	1										-9	-9	-9
1:150917433 G / A (rs200241875)		150917433	rs200241875	G	A	p.Arg330His	p.Arg330His	c.989G>A	PASS	missense	0	0.000101	0	1.09	1										-9	-9	-9
1:150917561 A / G		150917561	.	A	G	p.Ser373Gly	p.Ser373Gly	c.1117A>G	PASS	missense				0.894	1										-9	-9	-9
1:150917582 C / A		150917582	.	C	A	p.Leu380Met	p.Leu380Met	c.1138C>A	PASS	missense	1.58e-05	0.000101	0	1.09	1										-9	-9	-9
1:150919368 A / G		150919368	.	A	G	p.Lys383Glu	p.Lys383Glu	c.1147A>G	PASS	missense				0.9	1										-9	-9	-9
1:150919407 G / A		150919407	.	G	A	p.Glu396Lys	p.Glu396Lys	c.1186G>A	PASS	missense		0.000101	0	1.08	1										-9	-9	-9
1:150919413 A / C		150919413	.	A	C	p.Met398Leu	p.Met398Leu	c.1192A>C	PASS	missense				0.718	1										-9	-9	-9
1:150919431 T / G		150919431	.	T	G	p.Ser404Ala	p.Ser404Ala	c.1210T>G	PASS	missense		0.000101	0	1.08	1										-9	-9	-9
1:150919485 A / G		150919485	.	A	G	p.Met422Val	p.Met422Val	c.1264A>G	PASS	missense	1.57e-05			0.944	1										-9	-9	-9
1:150921610 G / C		150921610	.	G	C	p.Ser427Thr	p.Ser427Thr	c.1280G>C	PASS	missense		0.000101	0	1.09	1										-9	-9	-9
1:150921639 G / T		150921639	.	G	T	p.Asp437Tyr	p.Asp437Tyr	c.1309G>T	PASS	missense		0.000101	0	1.09	1										-9	-9	-9
1:150921690 A / G (rs373481235)		150921690	rs373481235	A	G	p.Thr454Ala	p.Thr454Ala	c.1360A>G	PASS	missense	4.7e-05	0	0.000181	0.767	1										-9	-9	-9
1:150921709 C / T		150921709	.	C	T	p.Pro460Leu	p.Pro460Leu	c.1379C>T	PASS	missense				0.91	1										-9	-9	-9
1:150921863 C / G		150921863	.	C	G	p.Ala481Gly	p.Ala481Gly	c.1442C>G	PASS	missense		0.000101	0	1.08	1										-9	-9	-9
1:150921940 A / C (rs140025790)		150921940	rs140025790	A	C	p.Thr507Pro	p.Thr507Pro	c.1519A>C	PASS	missense		0	0.000181	0.771	1										-9	-9	-9
1:150921964 G / A (rs185244961)		150921964	rs185244961	G	A	p.Val515Ile	p.Val515Ile	c.1543G>A	PASS	missense		0	0.000181	0.765	1										-9	-9	-9
1:150921973 G / C (rs368655601)		150921973	rs368655601	G	C	p.Gly518Arg	p.Gly518Arg	c.1552G>C	PASS	missense	3.14e-05	0	0.000181	0.765	1										-9	-9	-9
1:150922981 C / T		150922981	.	C	T	p.Pro543Leu	p.Pro543Leu	c.1628C>T	PASS	missense				1.26	1										-9	-9	-9
1:150923022 C / T		150923022	.	C	T	p.Arg557Trp	p.Arg557Trp	c.1669C>T	PASS	missense		0.000101	0	1.08	1										-9	-9	-9
1:150923137 G / A		150923137	.	G	A	p.Arg595Gln	p.Arg595Gln	c.1784G>A	PASS	missense		0.000101	0	1.08	1										-9	-9	-9
1:150923217 G / A		150923217	.	G	A	p.Gly622Ser	p.Gly622Ser	c.1864G>A	PASS	missense		0.000101	0	1.08	1										-9	-9	-9
1:150923262 A / T		150923262	.	A	T	p.Thr637Ser	p.Thr637Ser	c.1909A>T	PASS	missense		0.000101	0	1.09	1										-9	-9	-9
1:150933242 AATG / A		150933242	.	AATG	A	p.Asp904del	p.Asp904del	c.2710_2712delGAT	PASS	inframe deletion		0.000102	0	1.08	1										-9	-9	-9
1:150933387 C / A (rs368895041)		150933387	rs368895041	C	A	p.Pro950Gln	p.Pro950Gln	c.2849C>A	PASS	missense	4.71e-05	0	0.000181	0.766	1										-9	-9	-9
1:150933582 G / A		150933582	.	G	A	p.Gly1015Glu	p.Gly1015Glu	c.3044G>A	PASS	missense	1.58e-05	0.000101	0	1.08	1										-9	-9	-9
1:150933612 C / T		150933612	.	C	T	p.Ser1025Phe	p.Ser1025Phe	c.3074C>T	PASS	missense				1.29	1										0	5.0352e-05	5.00631
1:150934619 G / A (rs148408413)		150934619	rs148408413	G	A	p.Arg1048Gln	p.Arg1048Gln	c.3143G>A	PASS	missense		0	0.000181	0.767	1										-9	-9	-9
1:150935098 C / T		150935098	.	C	T	p.Pro1065Leu	p.Pro1065Leu	c.3194C>T	PASS	missense				0.912	1										-9	-9	-9
1:150935160 C / T		150935160	.	C	T	p.Arg1086Ter	p.Arg1086Ter	c.3256C>T	PASS	stop gained	3.14e-05	0	0.000181	0.766	1										-9	-9	-9
1:150935161 G / A		150935161	.	G	A	p.Arg1086Gln	p.Arg1086Gln	c.3257G>A	PASS	missense	1.57e-05			1.21	1										-9	-9	-9
1:150935489 G / A		150935489	.	G	A	p.Glu1111Lys	p.Glu1111Lys	c.3331G>A	PASS	missense				1.3	1										-9	-9	-9
1:150935529 C / T		150935529	.	C	T	p.Ser1124Leu	p.Ser1124Leu	c.3371C>T	PASS	missense	1.57e-05	0.000101	0	1.08	1										-9	-9	-9
1:150936039 C / T		150936039	.	C	T	p.Thr1164Ile	p.Thr1164Ile	c.3491C>T	PASS	missense		0.000101	0	1.08	1										-9	-9	-9
1:150936122 C / T		150936122	.	C	T	p.Pro1192Ser	p.Pro1192Ser	c.3574C>T	PASS	missense		0	0.000181	0.766	1										-9	-9	-9
1:150936129 G / A		150936129	.	G	A	p.Arg1194His	p.Arg1194His	c.3581G>A	PASS	missense	0	0.000101	0	1.08	1										-9	-9	-9
1:150936251 T / G (rs115690224)		150936251	rs115690224	T	G	p.Leu1235Val†	p.Leu1235Val	c.3703T>G	PASS	missense	3.26e-05	0.000101	0	1.09	1										-9	-9	-9
1:150936499 A / G		150936499	.	A	G	p.Gln1233Arg	p.Gln1233Arg	c.3698A>G	PASS	missense		0.000101	0	1.08	1										-9	-9	-9

## Sheet: AJ
Suppl Table 4_AJ cohort
exac_ENSG00000143379_2020_04_02_10_49_27_AJ
Variant	Enrichment	Position	RSID	Reference	Alternate	Consequence	Protein Consequence	Transcript Consequence	Filter	Annotation	ExAC NFE AF	IBD AF	non-IBD AF	Odds Ratio	P-value	Allele Count African	Allele Number African	Homozygote Count African	Allele Count East Asian	Allele Number East Asian	Homozygote Count East Asian	Allele Count European (Non-Finnish)	Allele Number European (Non-Finnish)	Homozygote Count European (Non-Finnish)	Allele Count Finnish	Allele Number Finnish	Homozygote Count Finnish	Allele Count Latino	Allele Number Latino	Homozygote Count Latino	Allele Count Other	Allele Number Other	Homozygote Count Other	Allele Count South Asian	Allele Number South Asian	Homozygote Count South Asian
1:150899275 T / C (rs374583229)	11.2	150899275	rs374583229	T	C	p.Trp8Arg†	p.Trp8Arg	c.22T>C	PASS	missense	0.000267	0.00379	0.00296	1.66	0.0969										-9	-9	-9
1:150899276 G / T		150899276	.	G	T	p.Trp8Leu†	p.Trp8Leu	c.23G>T	PASS	missense				1.12	1										-9	-9	-9
1:150900201 T / C		150900201	.	T	C	p.Leu4Pro	p.Leu4Pro	c.11T>C	PASS	missense				1.1	1										-9	-9	-9
1:150900260 G / C (rs200954915)		150900260	rs200954915	G	C	p.Glu24Gln	p.Glu24Gln	c.70G>C	PASS	missense	4.7e-05			1.97	0.175										0.00071839	0.00040282	2.13196
1:150900342 T / C (rs201917860)		150900342	rs201917860	T	C	p.Met51Thr	p.Met51Thr	c.152T>C	PASS	missense	0.000408			1.72	0.0897										0.0071839	0.0053374	1.30715
1:150900387 C / T		150900387	.	C	T	p.Thr66Ile	p.Thr66Ile	c.197C>T	PASS	missense	1.57e-05			1.08	1										-9	-9	-9
1:150900417 C / T (rs144623268)		150900417	rs144623268	C	T	p.Ala76Val	p.Ala76Val	c.227C>T	PASS	missense				0.764	1										-9	-9	-9
1:150900430 A / T (rs141840418)		150900430	rs141840418	A	T	p.Gln80His	p.Gln80His	c.240A>T	PASS	missense				0.767	1										-9	-9	-9
1:150902487 A / G		150902487	.	A	G	p.Lys102Arg	p.Lys102Arg	c.305A>G	PASS	missense	0			1.08	1										-9	-9	-9
1:150902504 C / T		150902504	.	C	T	p.Arg108Trp	p.Arg108Trp	c.322C>T	PASS	missense	1.57e-05			1.14	1										0	5.0363e-05	2.3444
1:150902535 G / A		150902535	.	G	A	p.Arg118Gln	p.Arg118Gln	c.353G>A	PASS	missense	4.7e-05			1.09	1										-9	-9	-9
1:150913872 A / G (rs374865519)		150913872	rs374865519	A	G	p.Asn172Ser	p.Asn172Ser	c.515A>G	PASS	missense	4.76e-05			0.763	1										-9	-9	-9
1:150915400 A / G		150915400	.	A	G	p.Tyr249Cys	p.Tyr249Cys	c.746A>G	PASS	missense		0	0.000164	0.906	1										-9	-9	-9
1:150915469 A / G		150915469	.	A	G	p.Asn272Ser	p.Asn272Ser	c.815A>G	PASS	missense				1.08	1										-9	-9	-9
1:150916432 T / C (rs140937930)		150916432	rs140937930	T	C	p.Met237Thr†	p.Met237Thr	c.710T>C	PASS	missense	6.27e-05			1.49	0.418										-9	-9	-9
1:150916444 G / A (rs138641374)		150916444	rs138641374	G	A	p.Arg241Gln†	p.Arg241Gln	c.722G>A	PASS	missense	0.000564			0.911	0.812										0.0021552	0.0024673	1.03272
1:150916454 C / T		150916454	.	C	T	p.Pro312Ser	p.Pro312Ser	c.934C>T	PASS	missense				0.762	1										-9	-9	-9
1:150917416 A / G		150917416	.	A	G	p.Ile324Met	p.Ile324Met	c.972A>G	PASS	missense				1.08	1										-9	-9	-9
1:150917433 G / A (rs200241875)		150917433	rs200241875	G	A	p.Arg330His	p.Arg330His	c.989G>A	PASS	missense	0			1.09	1										-9	-9	-9
1:150917561 A / G		150917561	.	A	G	p.Ser373Gly	p.Ser373Gly	c.1117A>G	PASS	missense		0.000189	0	0.894	1										-9	-9	-9
1:150917582 C / A		150917582	.	C	A	p.Leu380Met	p.Leu380Met	c.1138C>A	PASS	missense	1.58e-05			1.09	1										-9	-9	-9
1:150919368 A / G		150919368	.	A	G	p.Lys383Glu	p.Lys383Glu	c.1147A>G	PASS	missense		0	0.000164	0.9	1										-9	-9	-9
1:150919407 G / A		150919407	.	G	A	p.Glu396Lys	p.Glu396Lys	c.1186G>A	PASS	missense				1.08	1										-9	-9	-9
1:150919413 A / C		150919413	.	A	C	p.Met398Leu	p.Met398Leu	c.1192A>C	PASS	missense		0.000189	0	0.718	1										-9	-9	-9
1:150919431 T / G		150919431	.	T	G	p.Ser404Ala	p.Ser404Ala	c.1210T>G	PASS	missense				1.08	1										-9	-9	-9
1:150919485 A / G		150919485	.	A	G	p.Met422Val	p.Met422Val	c.1264A>G	PASS	missense	1.57e-05	0.00019	0	0.944	1										-9	-9	-9
1:150921610 G / C		150921610	.	G	C	p.Ser427Thr	p.Ser427Thr	c.1280G>C	PASS	missense				1.09	1										-9	-9	-9
1:150921639 G / T		150921639	.	G	T	p.Asp437Tyr	p.Asp437Tyr	c.1309G>T	PASS	missense				1.09	1										-9	-9	-9
1:150921690 A / G (rs373481235)		150921690	rs373481235	A	G	p.Thr454Ala	p.Thr454Ala	c.1360A>G	PASS	missense	4.7e-05			0.767	1										-9	-9	-9
1:150921709 C / T		150921709	.	C	T	p.Pro460Leu	p.Pro460Leu	c.1379C>T	PASS	missense		0	0.000164	0.91	1										-9	-9	-9
1:150921863 C / G		150921863	.	C	G	p.Ala481Gly	p.Ala481Gly	c.1442C>G	PASS	missense				1.08	1										-9	-9	-9
1:150921940 A / C (rs140025790)		150921940	rs140025790	A	C	p.Thr507Pro	p.Thr507Pro	c.1519A>C	PASS	missense				0.771	1										-9	-9	-9
1:150921941 C / T		150921941	.	C	T	p.Thr507Ile	p.Thr507Ile	c.1520C>T	PASS	missense		0.000379	0.000164	0.647	0.375										-9	-9	-9
1:150921964 G / A (rs185244961)		150921964	rs185244961	G	A	p.Val515Ile	p.Val515Ile	c.1543G>A	PASS	missense				0.765	1										-9	-9	-9
1:150921973 G / C (rs368655601)		150921973	rs368655601	G	C	p.Gly518Arg	p.Gly518Arg	c.1552G>C	PASS	missense	3.14e-05			0.765	1										-9	-9	-9
1:150922981 C / T		150922981	.	C	T	p.Pro543Leu	p.Pro543Leu	c.1628C>T	PASS	missense		0.000192	0	1.26	1										-9	-9	-9
1:150923022 C / T		150923022	.	C	T	p.Arg557Trp	p.Arg557Trp	c.1669C>T	PASS	missense				1.08	1										-9	-9	-9
1:150923137 G / A		150923137	.	G	A	p.Arg595Gln	p.Arg595Gln	c.1784G>A	PASS	missense				1.08	1										-9	-9	-9
1:150923217 G / A		150923217	.	G	A	p.Gly622Ser	p.Gly622Ser	c.1864G>A	PASS	missense				1.08	1										-9	-9	-9
1:150923262 A / T		150923262	.	A	T	p.Thr637Ser	p.Thr637Ser	c.1909A>T	PASS	missense				1.09	1										-9	-9	-9
1:150923841 G / T		150923841	.	G	T	p.Lys738Asn	p.Lys738Asn	c.2214G>T	PASS	missense				1.92	0.109										0	0.00010072	5.66326
1:150933242 AATG / A		150933242	.	AATG	A	p.Asp904del	p.Asp904del	c.2710_2712delGAT	PASS	inframe deletion				1.08	1										-9	-9	-9
1:150933377 T / C		150933377	.	T	C	p.Ser947Pro	p.Ser947Pro	c.2839T>C	PASS	missense	0.000236			1.95	0.113										0.0021583	0.0027786	1.38867
1:150933386 C / G		150933386	.	C	G	p.Pro950Ala	p.Pro950Ala	c.2848C>G	PASS	missense				2.11	0.112										0.00071942	5.0474e-05	5.38329
1:150933387 C / A (rs368895041)		150933387	rs368895041	C	A	p.Pro950Gln	p.Pro950Gln	c.2849C>A	PASS	missense	4.71e-05			0.766	1										-9	-9	-9
1:150933468 C / T (rs113110991)		150933468	rs113110991	C	T	p.Pro977Leu	p.Pro977Leu	c.2930C>T	PASS	missense	0.00274	0.000947	0	1.27	0.359										0	0.0019134	0.184686
1:150933501 A / G		150933501	.	A	G	p.Asn988Ser	p.Asn988Ser	c.2963A>G	PASS	missense	0.000157			0.705	0.475										-9	-9	-9
1:150933514 A / T (rs138864506)		150933514	rs138864506	A	T	p.Glu992Asp	p.Glu992Asp	c.2976A>T	PASS	missense	0.000674	0.000758	0.000329	1.4	0.484										0.00071839	0	60.4671
1:150933564 G / C (rs372956009)		150933564	rs372956009	G	C	p.Gly1009Ala	p.Gly1009Ala	c.3026G>C	PASS	missense	1.57e-05			1.21	0.678										-9	-9	-9
1:150933582 G / A		150933582	.	G	A	p.Gly1015Glu	p.Gly1015Glu	c.3044G>A	PASS	missense	1.58e-05			1.08	1										-9	-9	-9
1:150933591 G / T (rs149404089)		150933591	rs149404089	G	T	p.Arg1018Leu	p.Arg1018Leu	c.3053G>T	PASS	missense	0.000379			2.39	0.0633										0.00071839	0.00020149	5.96793
1:150933600 C / T (rs150892641)	0.11	150933600	rs150892641	C	T	p.Ala1021Val	p.Ala1021Val	c.3062C>T	PASS	missense	0.000617	0.00303	0.00378	0.709	0.238										-9	-9	-9
1:150933612 C / T		150933612	.	C	T	p.Ser1025Phe	p.Ser1025Phe	c.3074C>T	PASS	missense				1.29	1										0	5.0352e-05	5.00631
1:150933620 G / A		150933620	.	G	A	p.Gly1028Arg	p.Gly1028Arg	c.3082G>A	PASS	missense	1.59e-05	0.000379	0	0.701	0.382										-9	-9	-9
1:150934618 C / G		150934618	.	C	G	p.Arg1048Gly	p.Arg1048Gly	c.3142C>G	PASS	missense		0.000189	0.000164	0.63	0.326										-9	-9	-9
1:150934619 G / A (rs148408413)		150934619	rs148408413	G	A	p.Arg1048Gln	p.Arg1048Gln	c.3143G>A	PASS	missense				0.767	1										-9	-9	-9
1:150935098 C / T		150935098	.	C	T	p.Pro1065Leu	p.Pro1065Leu	c.3194C>T	PASS	missense		0	0.000164	0.912	1										-9	-9	-9
1:150935124 C / T (rs147846533)		150935124	rs147846533	C	T	p.Arg1074Cys	p.Arg1074Cys	c.3220C>T	PASS	missense	0.000235	0	0.000164	1.5	0.417										0	0.00015107	1.50265
1:150935127 C / T (rs145309946)		150935127	rs145309946	C	T	p.Arg1075Cys	p.Arg1075Cys	c.3223C>T	PASS	missense	0.000408			3.05	0.0127										0.0021552	0.0004029	2.58664
1:150935160 C / T		150935160	.	C	T	p.Arg1086Ter	p.Arg1086Ter	c.3256C>T	PASS	stop gained	3.14e-05			0.766	1										-9	-9	-9
1:150935161 G / A		150935161	.	G	A	p.Arg1086Gln	p.Arg1086Gln	c.3257G>A	PASS	missense	1.57e-05	0.000189	0	1.21	1										-9	-9	-9
1:150935489 G / A		150935489	.	G	A	p.Glu1111Lys	p.Glu1111Lys	c.3331G>A	PASS	missense		0.00019	0	1.3	1										-9	-9	-9
1:150935529 C / T		150935529	.	C	T	p.Ser1124Leu	p.Ser1124Leu	c.3371C>T	PASS	missense	1.57e-05			1.08	1										-9	-9	-9
1:150935609 A / G (rs143031515)		150935609	rs143031515	A	G	p.Met1151Val	p.Met1151Val	c.3451A>G	PASS	missense	0.000802			0.682	0.431										0	0.00020184	1.54465
1:150936011 A / G (rs371841791)		150936011	rs371841791	A	G	p.Met1155Val	p.Met1155Val	c.3463A>G	PASS	missense	0.000142			0.826	0.685										-9	-9	-9
1:150936039 C / T		150936039	.	C	T	p.Thr1164Ile	p.Thr1164Ile	c.3491C>T	PASS	missense				1.08	1										-9	-9	-9
1:150936122 C / T		150936122	.	C	T	p.Pro1192Ser	p.Pro1192Ser	c.3574C>T	PASS	missense				0.766	1										-9	-9	-9
1:150936129 G / A		150936129	.	G	A	p.Arg1194His	p.Arg1194His	c.3581G>A	PASS	missense	0			1.08	1										-9	-9	-9
1:150936251 T / G (rs115690224)		150936251	rs115690224	T	G	p.Leu1235Val†	p.Leu1235Val	c.3703T>G	PASS	missense	3.26e-05			1.09	1										-9	-9	-9
1:150936499 A / G		150936499	.	A	G	p.Gln1233Arg	p.Gln1233Arg	c.3698A>G	PASS	missense				1.08	1										-9	-9	-9
1:150936815 T / C (rs147607619)		150936815	rs147607619	T	C	p.Ile1284Thr	p.Ile1284Thr	c.3851T>C	PASS	missense	3.18e-05			1.31	0.537										0	5.0352e-05	5.06574
